# Supplementary material for: Integration of bubble phobicity, gas sensing and friction alleviation into a versatile MoS2/SnO2/CNF heterostructure by an impressive, simple and effective method
Source: Royal Society of Chemistry journal article supplement (doi:10.1039/d0nr05378c), 2020-01-01
Supplement: d0nr05378c1.pdf [file d0nr05378c1.pdf]

*Electronic Supporting Information*

**Integration of bubble phobicity, gas sensing and alleviating friction into a versatile  
MoS<sub>2</sub>/SnO<sub>2</sub>/CNF heterostructure by an impressive simple but effective method †**

Fuchao Yang<sup>#a</sup>, Caiyun Wang<sup>#b</sup> and Zhiguang Guo<sup>\*ac</sup>

<sup>a</sup> Ministry of Education Key Laboratory for the Green Preparation and Application of Functional Materials, School of Materials Science & Engineering and Hubei Key Laboratory of Polymer Materials, Hubei University, Wuhan 430062, People's Republic of China

<sup>b</sup> Center for Nanoscale Characterization & Devices (CNCD), School of Physics & Wuhan National Laboratory for Optoelectronics (WNLO), Huazhong University of Science and Technology (HUST), Wuhan 430074, P. R. China.

<sup>c</sup> State Key Laboratory of Solid Lubrication, Lanzhou Institute of Chemical Physics, Chinese Academy of Sciences, Lanzhou 730000, People's Republic of China

\* The corresponding author: Tel: 0086-931-4968105; Fax: 0086-931-8277088; Email: zguo@licp.cas.cn.

† Electronic supplementary information (ESI) available.

# The authors contributed equally to this work.

## *Electronic Supporting Information*

### **Experimental Section**

#### 1. Reagents and preparation of MoS<sub>2</sub>/SnO<sub>2</sub>/CNF

Carbon nanofibers (CNF, >98%) was obtained from Sigma Aldrich (Shanghai) Trading Co., Ltd. The stannous chloride dihydrate (SnCl<sub>2</sub>·2H<sub>2</sub>O) was purchased from Tianjin Damao Chemical Reagent Co. Ltd, China. Trisodium citrate dihydrate (C<sub>6</sub>H<sub>5</sub>Na<sub>3</sub>O<sub>7</sub>·2H<sub>2</sub>O) was obtained from Xilong Chemical Reagent Co. Ltd, China. The sodium molybdate (Na<sub>2</sub>MoO<sub>4</sub>·2H<sub>2</sub>O, >99.0%) and thiourea (CH<sub>4</sub>N<sub>2</sub>S, >99.0%) were provided by Shanghai Guangming Chemical Reagent Co.,Ltd and Sinopharm Chemical Reagent Co.,Ltd (China), respectively. All the chemicals were of analytical-grade and used as received without further purification.

The 20 mmol SnCl<sub>2</sub>·2H<sub>2</sub>O and 40 mmol C<sub>6</sub>H<sub>5</sub>Na<sub>3</sub>O<sub>7</sub>·2H<sub>2</sub>O were dissolved in a 160 mL mixed solution of deionized water and ethanol (volume ratio, 1:1) under magnetic stirring. Next the 10 mmol carbon nanofiber was added into the above mixed solution and this system was kept stirring for 1 hour. Then it was transformed into Teflon-lined steel autoclaves. The precursor was subjected to a solvothermal process 180 °C for 10 h and then cooled down to the room temperature naturally. After being washed several times, the SnO<sub>2</sub>/CNF product was collected and part of them was applied to the coming synthesis of MoS<sub>2</sub>/SnO<sub>2</sub>/CNF. The SnO<sub>2</sub>/CNF with a mass of 0.65 g was added into the 80 mL mixed solution containing of 5 mmol sodium molybdate and 20 mmol thiourea under vigorous stirring. The hydrothermal procedure is also fixed at 180 °C for 10 h and the final product of MoS<sub>2</sub>/SnO<sub>2</sub>/CNF was harvested after the cooling and washing processes. These products were not subjected to thermal annealing process.

#### 2 Materials characterizations

Surface morphologies were observed by environmental field-emission scanning electron

### *Electronic Supporting Information*

microscopy (EFEM; FEI QUANTA FEG 650) and transmission electron microscopy (TEM, FEI Tecnai G20 and operating at 300 KV). The crystal structure was investigated by X-ray diffraction (XRD) using an X'PERT PRO diffractometer with Cu K $\alpha$  radiation ( $\lambda = 1.5418 \text{ \AA}$ ) at  $2\theta$  ranging from  $10^\circ$  to  $80^\circ$ . The information about specific surface area and pore diameter distribution of the products were tested by the single point Brunauer–Emmett–Teller (BET) and Barrett–Joyner–Halenda (BJH) method through nitrogen adsorption/desorption analysis (ASAP 2010, USA Micromeritics). Thermogravimetry (TG) and differential thermal analysis (DTA) measurements were performed in air or N $_2$  with a heating rate of  $10 \text{ }^\circ\text{C}/\text{min}$  using a NETZSCH STA 449F3 apparatus. Raman scattering spectra of CNF, SnO $_2$ /CNF, MoS $_2$ /SnO $_2$ /CNF and wear scars were carried out by LabRAM HR Evolution using 532 nm argon ion laser as the excitation source. UV–visible absorption spectra were recorded by using a Cary 60 spectrophotometer (Agilent). Chemical composition information was obtained by X-ray photoelectron spectroscopy (XPS, Thermo Scientific ESCALAB 250xi) using Al K $\alpha$  radiation. The binding energies were referenced to the C 1s line at 284.8 eV. The MicroXAM-3D non-contact surface profiler was employed to obtain the wear volume and morphologies of the wear scars.

#### 3 The preparation and details for functional test

The MoS $_2$ /SnO $_2$ /CNF coatings can be formed by spraying method (the concentration of dispersion: 0.05 g MoS $_2$ /SnO $_2$ /CNF in 50 ml anhydrous ethanol) on the following substrates: glass, silicon, sponge, AISI 52100 steel disk, copper screen, fabric, copper slice and stainless steel meshes. The spray gun was under 0.2 MPa N $_2$  gas flow and the distance from nozzle to substrate material is about 20 cm. The static oil (or bubble) contact angles (CA) of MoS $_2$ /SnO $_2$ /CNF coatings on various substrates were characterized using a JC2000D system with a 5 (or 3)  $\mu\text{L}$  volume. Gas sensing

### *Electronic Supporting Information*

apparatus applied in our experiment is WS-60A. The as-prepared MoS<sub>2</sub>/SnO<sub>2</sub>/CNF or SnO<sub>2</sub>/CNF powder was mixed with a droplet (3 μL) of deionized water to form paste and then coated onto the surface of a ceramic tube on which a pair of gold electrodes was previously printed, forming current closed loops. These gas sensing materials of MoS<sub>2</sub>/SnO<sub>2</sub>/CNF or SnO<sub>2</sub>/CNF were not subjected to annealing process and the operating temperature is as low as at 200 °C. Further details about the gas sensing test can be found in our previous work.<sup>[S1]</sup> The lubricating performances of MoS<sub>2</sub>/SnO<sub>2</sub>/CNF as annexing agent in base or commercial lubricating oil was characterized by Optimol SRV-IV oscillating reciprocating friction and wear tester. The running ball (ø = 10 mm) and stationary disk (ø = 24.0 mm × 7.9 mm) are AISI 52100 steel. The MoS<sub>2</sub>/SnO<sub>2</sub>/CNF or MoS<sub>2</sub>/SnO<sub>2</sub>/CNF was added into the Poly Alpha Olefin 4 (PAO4), CNOOC (China National Offshore Oil Corporation), Abu Dhabi 100N base oil or commercial 5W30 lubricating oil with the fixed additive amount of 0.0420 g/mL. Some key test parameters are set as Frequency = 25 Hz; Load = 100 or 250 N; Amplitude = 1 mm; Temperature = 20 °C; Time = 30 min.

Supplementary Figures

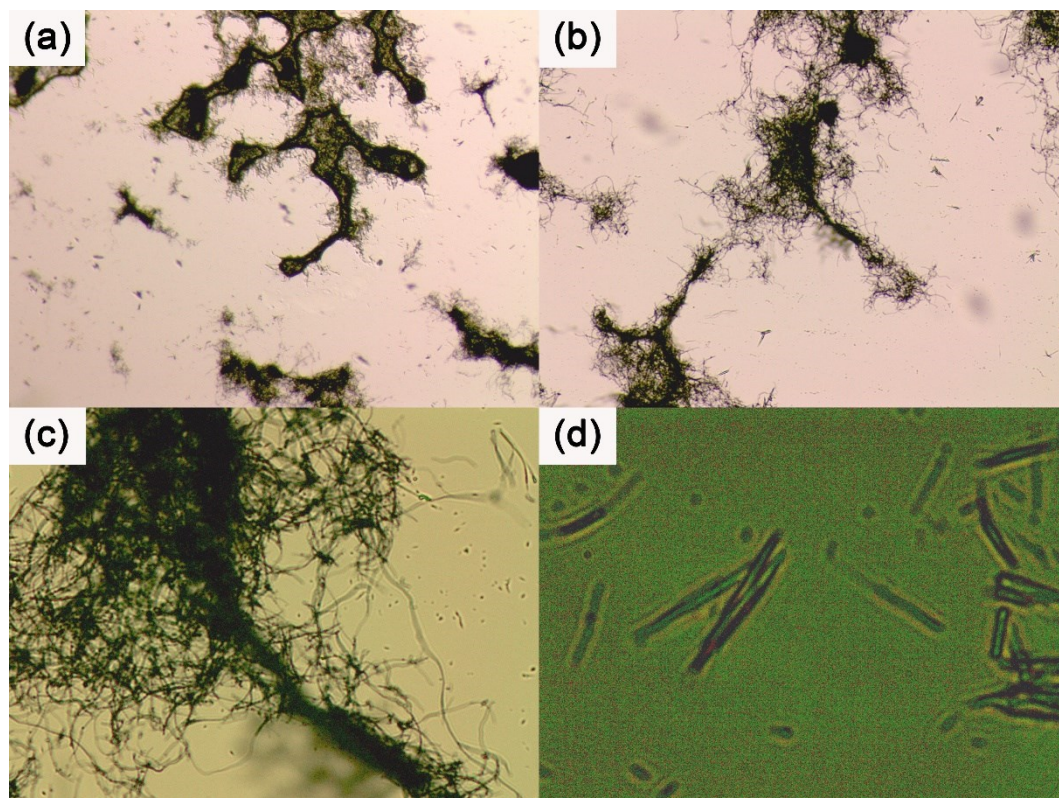

**Fig.S1** The optical microscope view of CNF (a) multiply by 40 times magnification, (b) multiply by 100 times magnification, (c) multiply by 400 times magnification and (d) multiply by 1000 times magnification.

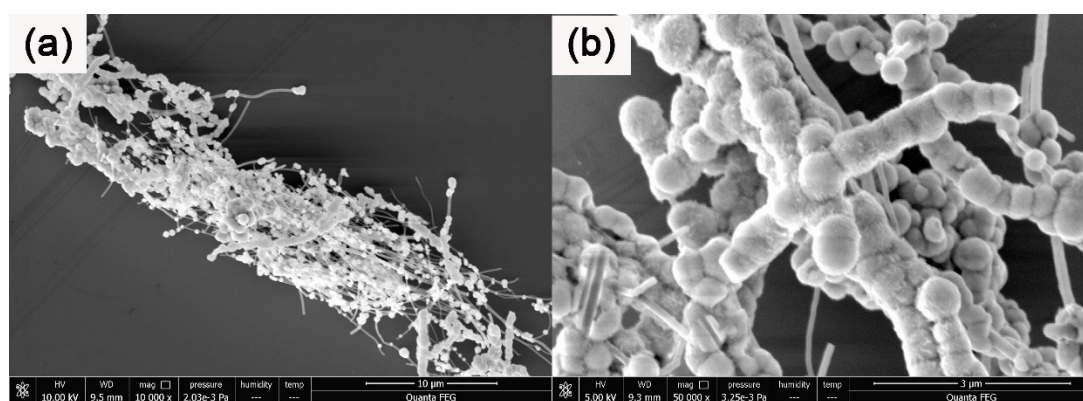

**Fig.S2** The EFSEM view of SnO<sub>2</sub>/CNF (a) multiply by  $1 \times 10^4$  times magnification and (b) multiply by  $5 \times 10^4$  times magnification.

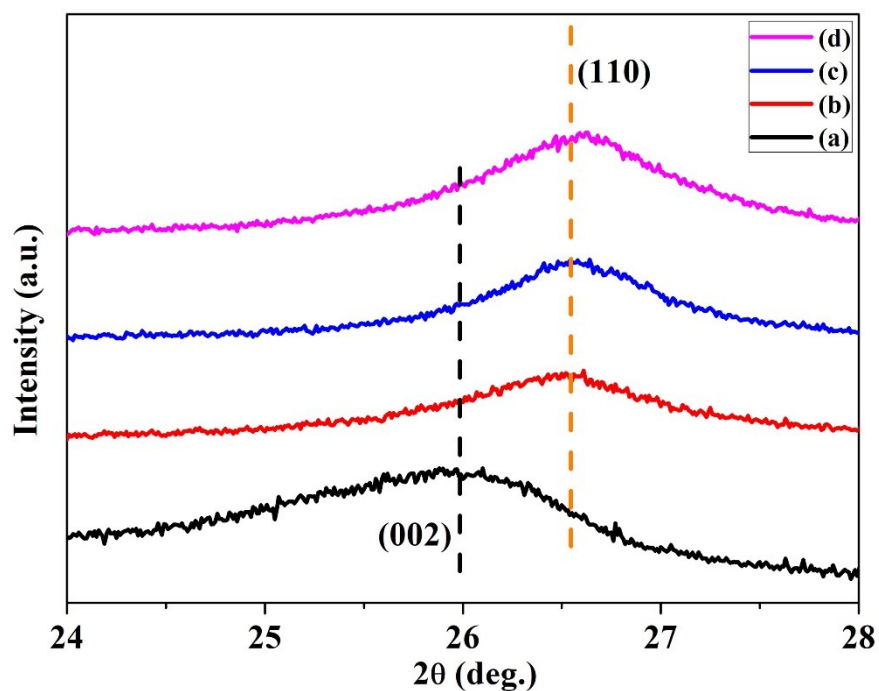

Fig.S3 The XRD pattern enlarge view of dominated reflection: (a) CNF, (b) SnO<sub>2</sub>/CNF, (c) MoS<sub>2</sub>/SnO<sub>2</sub>/CNF and (d) MoS<sub>2</sub>/SnO<sub>2</sub>.

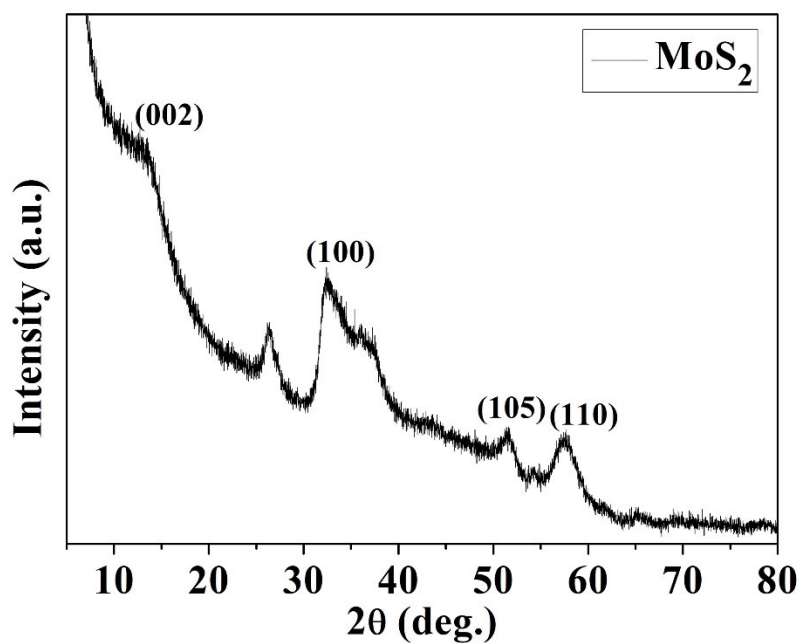

Fig.S4 The XRD pattern of MoS<sub>2</sub> synthesized by hydrothermal method in our experiment.

The reference PDF card of MoS<sub>2</sub> is ICDD No. 03-065-0160, indicating a hexagonal structure with

the space group P63/mnc.

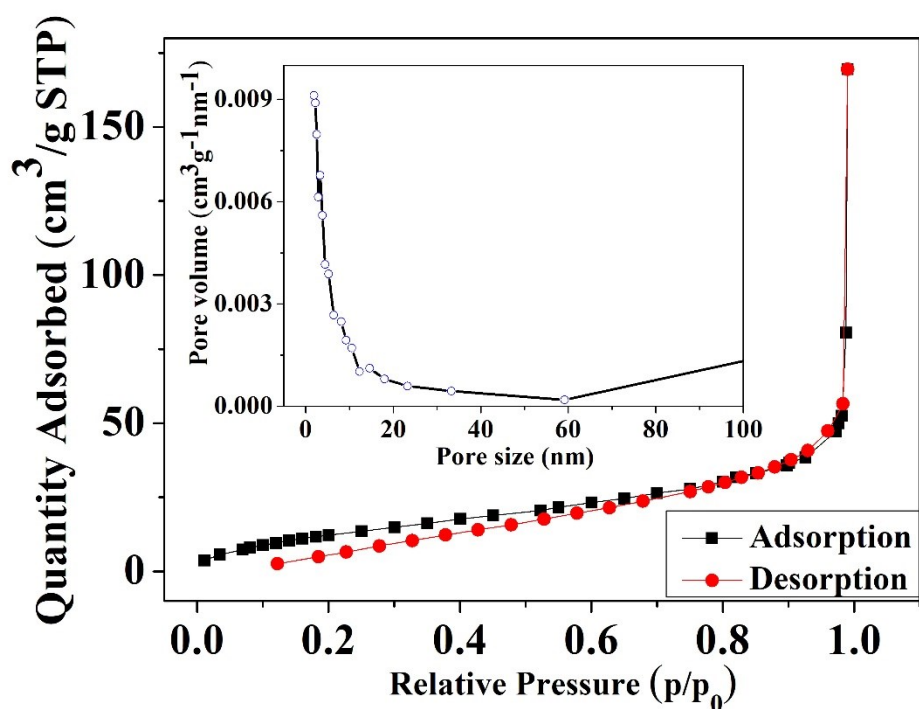

Fig.S5 The N<sub>2</sub> adsorption/desorption analysis of pristine CNF.

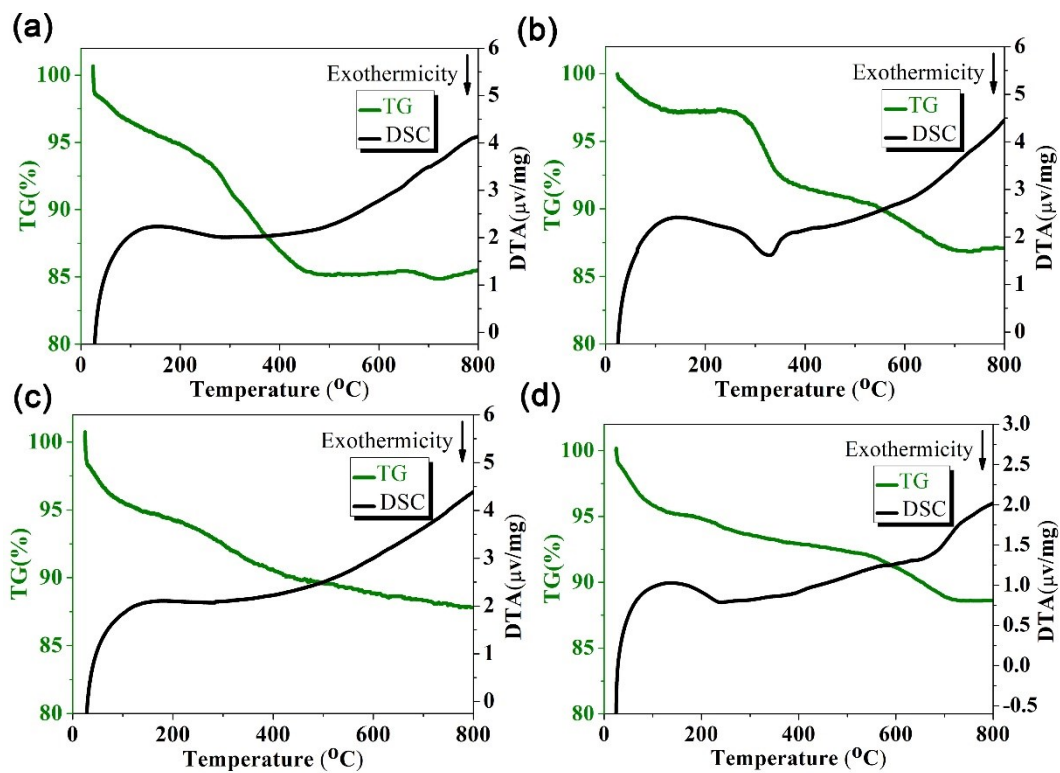

Fig.S6 The thermogravimetry (TG) and differential thermal analysis (DTA) of SnO<sub>2</sub>/CNF (a)

## Electronic Supporting Information

under N<sub>2</sub> atmosphere and (b) under O<sub>2</sub> atmosphere, and MoS<sub>2</sub>/SnO<sub>2</sub>/CNF (c) under N<sub>2</sub> atmosphere and (d) under O<sub>2</sub> atmosphere.

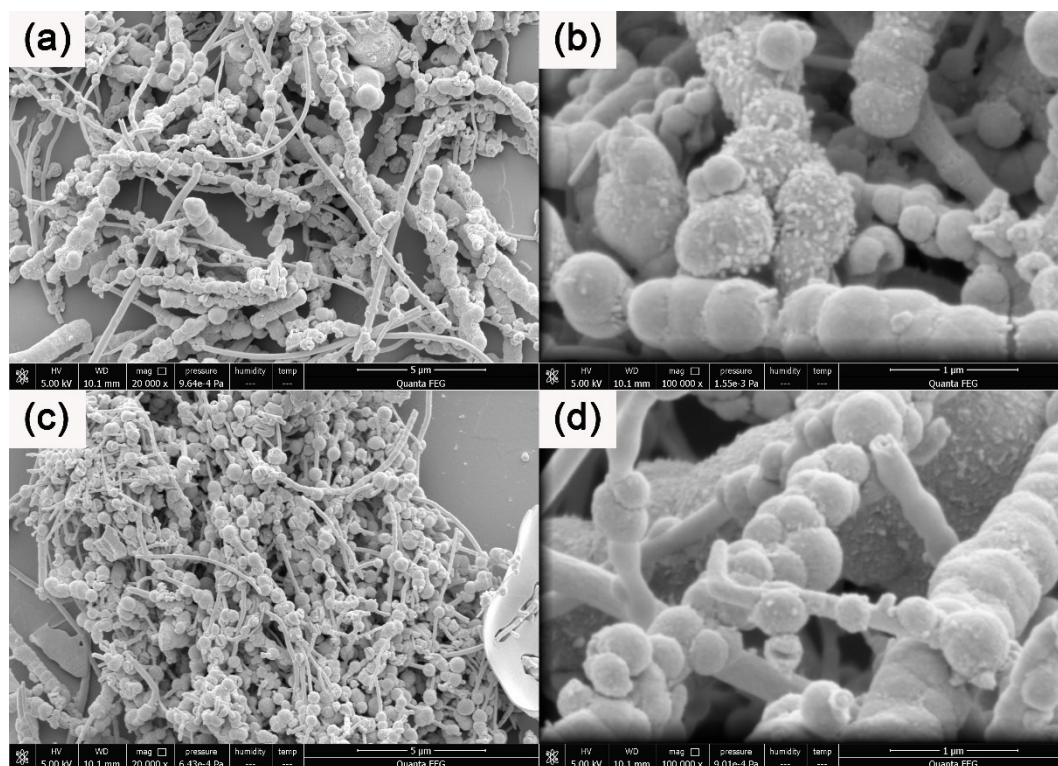

**Fig.S7** The typical EFSEM images of the morphology of (a-b) SnO<sub>2</sub>/CNF and (c-d) MoS<sub>2</sub>/SnO<sub>2</sub>/CNF after 500 °C heat treating for 2 h.

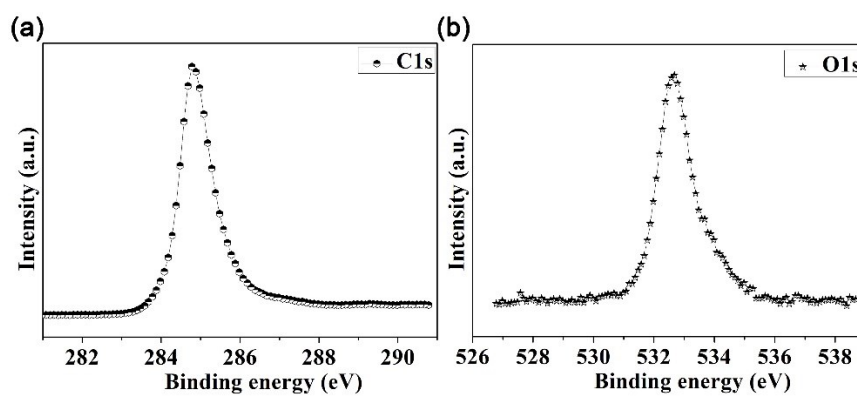

**Fig.S8** The XPS fine spectra of CNF sample: (a) C1s and (b) O1s peak.



Electronic Supporting Information

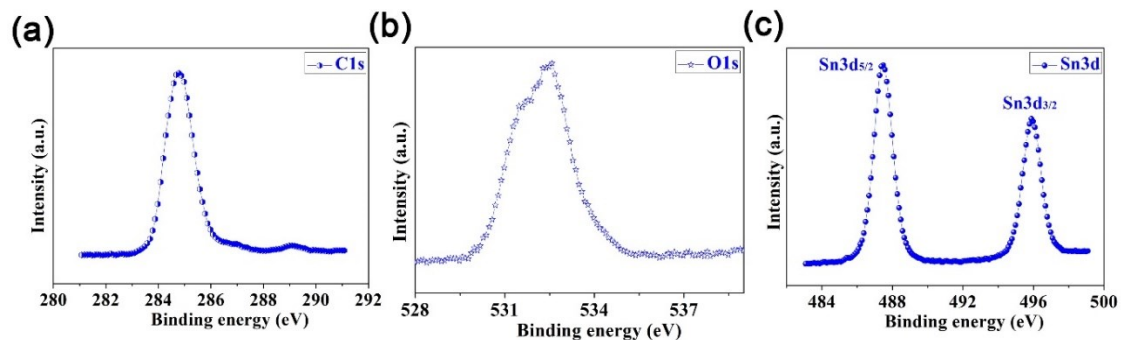

Fig.S7 The XPS fine spectra of SnO<sub>2</sub>/CNF sample: (a) C1s, (b) O1s and (c) Sn3d peak.

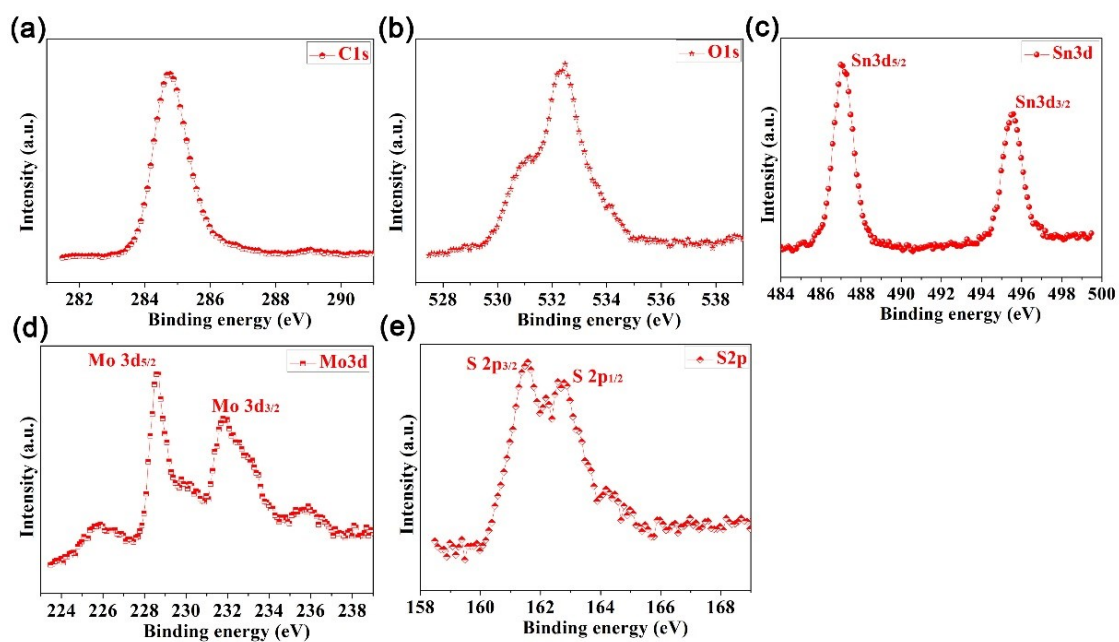

Fig.S10 The XPS fine spectra of MoS<sub>2</sub>/SnO<sub>2</sub>/CNF sample: (a) C1s, (b), O1s, (c) Sn3d, (d) Mo3d and (e) S2p peak.

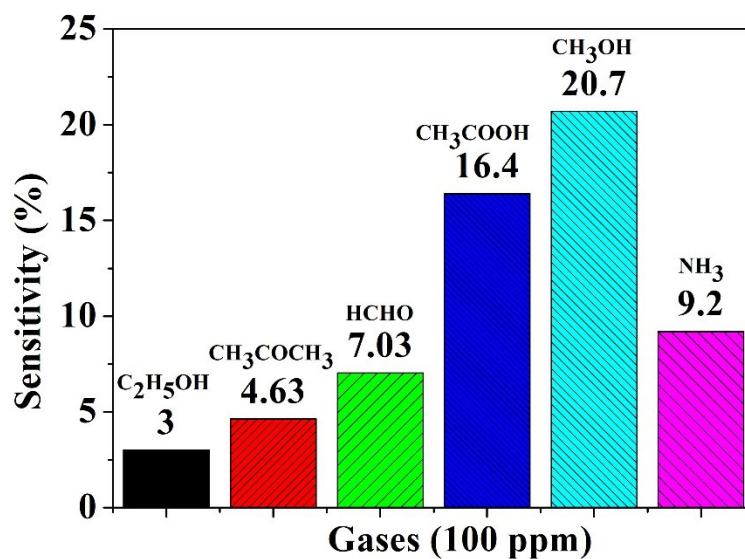

Fig.S11 The selectivity of MoS<sub>2</sub>/SnO<sub>2</sub>/CNF gas sensing material.

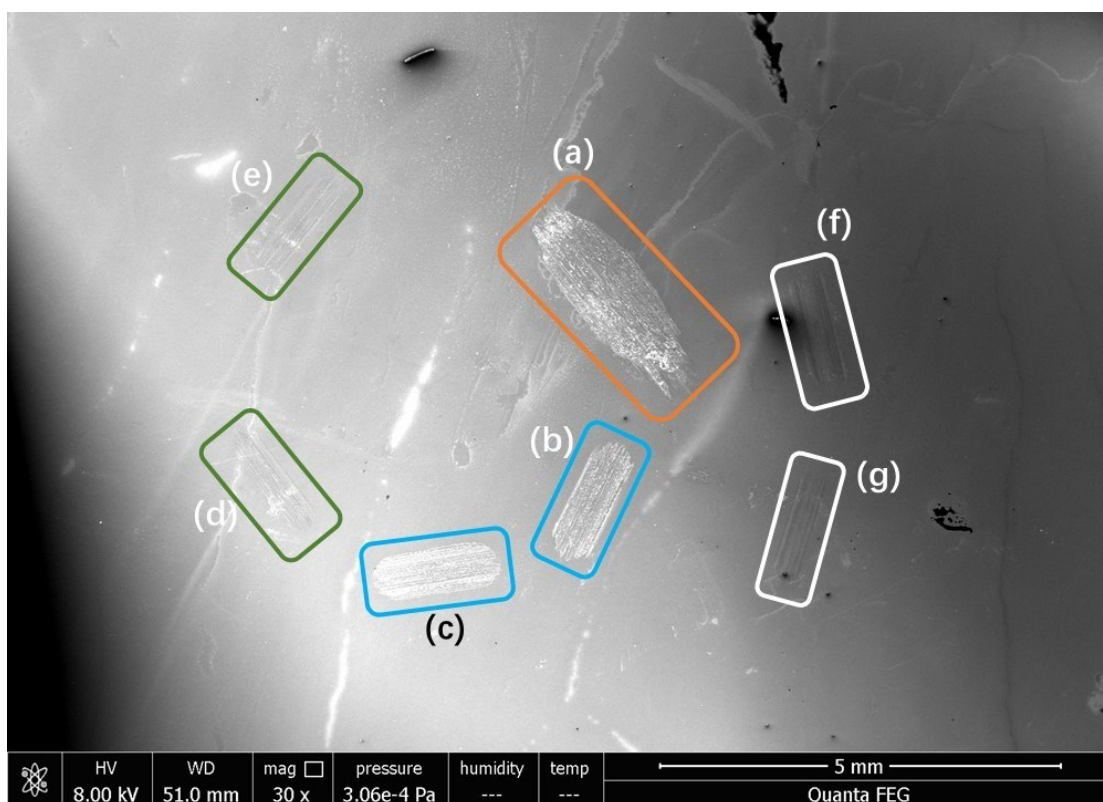

Fig.S12 The overview of worn scars on the steel disk lubricated by PAO4 and its additives.

Zone (a) is lubricated by PAO4 under 250 N loading. Zone (b-c) is lubricated by PAO4 under 100 N loading. Zone (d-e) is lubricated by PAO4 and MoS<sub>2</sub>/SnO<sub>2</sub>/CNF additives under 100 N

*Electronic Supporting Information*

loading. Zone (f-g) is lubricated by PAO4 and MoS<sub>2</sub>/SnO<sub>2</sub> additives under 100 N loading.

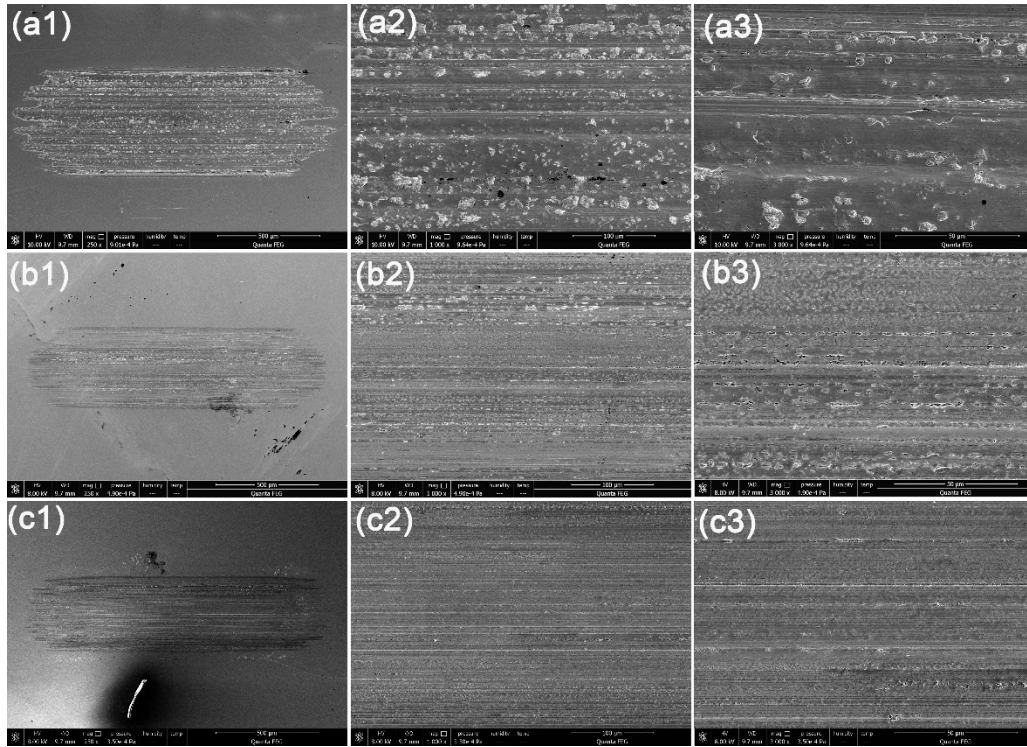

**Fig.S13** The FESEM observation of worn scars on the steel disk lubricated by PAO4 (a1-a3); by PAO4-MoS<sub>2</sub>/SnO<sub>2</sub>/CNF additives (b1-b3); and by PAO4-MoS<sub>2</sub>/SnO<sub>2</sub> additives (c1-c3).

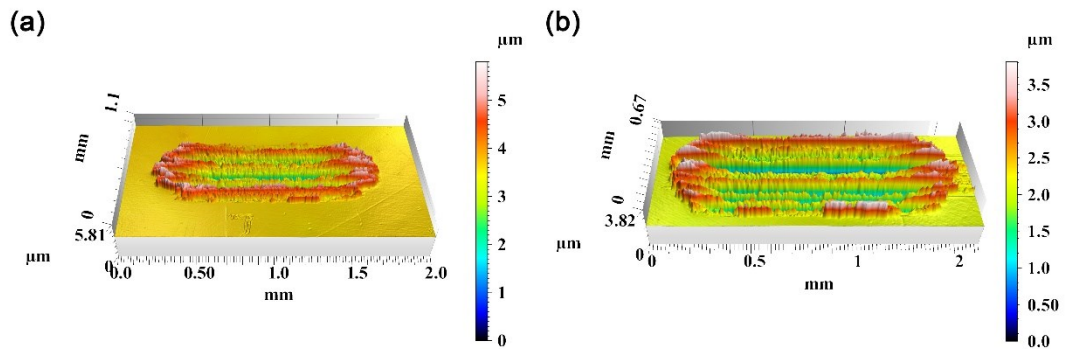

**Fig.S14** The 3D profiles from (a) CNOOC 32# and (b) Abu Dhabi 100N black control friction test.

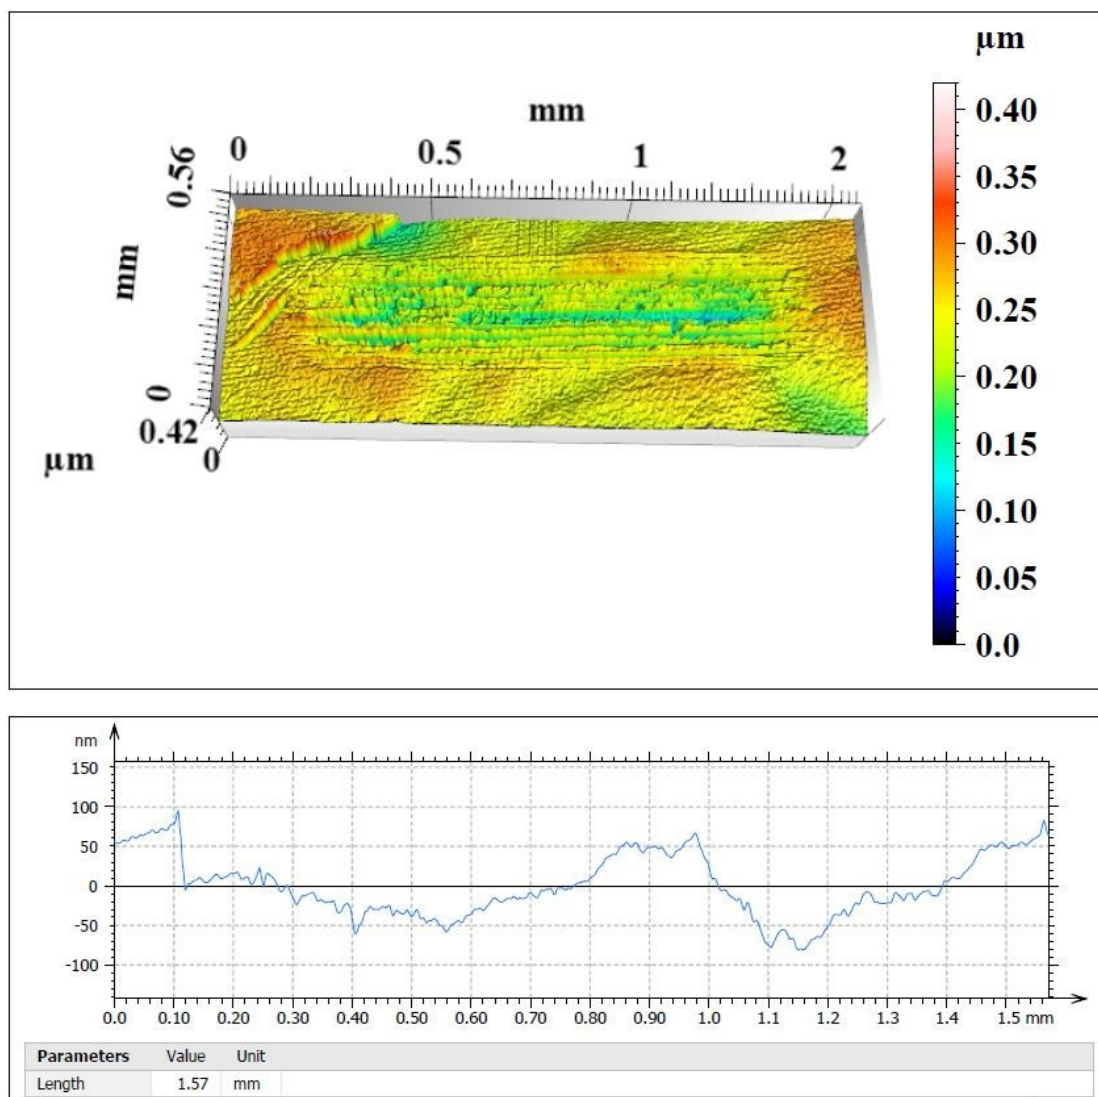

Fig.S15 The 3D profiles from commercial 5W30 lubricant oil black control friction test.

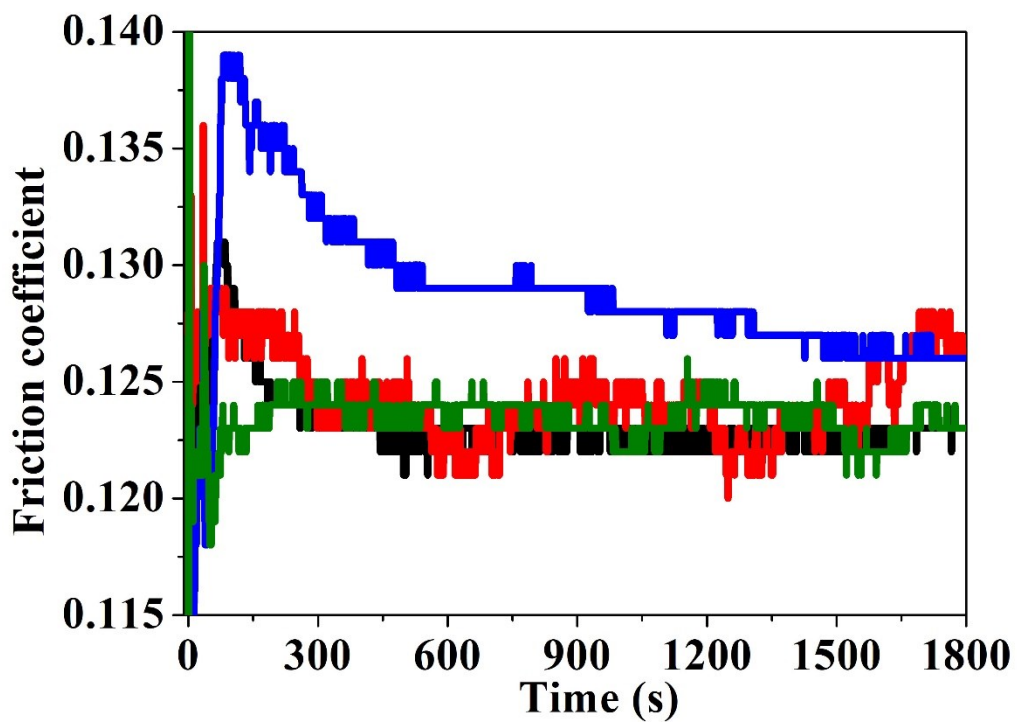

Fig.S16 The extremely enlarged view of real-time COF of MoS<sub>2</sub>/SnO<sub>2</sub>/CNF additive in 5W30.

**Black line:** 5W30, Load: 100N; **Red line:** 5W30& MoS<sub>2</sub>/SnO<sub>2</sub>/CNF, Load: 100N. **Blue line:** 5W30, Load: 250N; **Green line:** 5W30& MoS<sub>2</sub>/SnO<sub>2</sub>/CNF, Load: 250N.

*Electronic Supporting Information*

Table S1. The bubble CA values on different kinds of substrates underwater and under PAO4.

|    | Bubble CAs underwater |          | Bubble CAs under PAO4 |        |
|----|-----------------------|----------|-----------------------|--------|
|    | Neat                  | Coated   | Neat                  | Coated |
| S1 | 102.5 ±2°             | 134±3°   | 139.5±3°              | 147±4° |
| S2 | 118.5±4°              | 146.5±5° | 152.5±4°              | 145±4° |
| S3 | 136±3°                | 151.5±3° | 135±3°                | 130±5° |
| S4 | 128±6°                | 146±8°   | 156±4°                | 144±3° |
| S5 | 123±8°                | 141±3°   | 151±4°                | 131±5° |
| S6 | 138±8°                | 146±9°   | 153±3°                | 136±4° |
| S7 | 115±3°                | 125±6°   | 149±8°                | 140±6° |
| S8 | 128±6°                | 137±3°   | 150±6°                | 143±6° |

*Electronic Supporting Information*

Table S2. The sensitivity (%) value to ethanol, acetone and formaldehyde with 5-1500 ppm.

| (ppm) | ethanol | acetone | formaldehyde | Operating temperature |
|-------|---------|---------|--------------|-----------------------|
| 5     | 1.49    | 2.57    | 1.77         | 200 °C                |
| 10    | 1.98    | 2.71    | 2.32         | 200 °C                |
| 20    | 1.64    | 3.68    | 3.49         | 200 °C                |
| 50    | 2.09    | 3.36    | 7.21         | 200 °C                |
| 100   | 3.00    | 4.63    | 7.03         | 200 °C                |
| 200   | 3.84    | 6.21    | 6.01         | 200 °C                |
| 400   | 4.39    | 7.52    | 7.06         | 200 °C                |
| 800   | 5.42    | 9.43    | 6.86         | 200 °C                |
| 1000  | 7.04    | 14.2    | 7.96         | 200 °C                |
| 1500  | 9.97    | 21.5    | 12.0         | 200 °C                |

### Electronic Supporting Information

Table S3. The comparison of sensitivity (%) between this work (MoS<sub>2</sub>/SnO<sub>2</sub>/CNF) and similar state-of-the-art materials.

| (ppm) | Acetone gas<br>(MoS <sub>2</sub> /SnO <sub>2</sub> /CNF) | Gas sensing<br>material                                          | Targeting<br>gas                  | Sensitivity | Operating<br>temperature |
|-------|----------------------------------------------------------|------------------------------------------------------------------|-----------------------------------|-------------|--------------------------|
| 5     | 2.57                                                     | WO <sub>3</sub> -NWAs <sup>[S2]</sup>                            | CH <sub>3</sub> COCH <sub>3</sub> | ~30*        | 300 °C                   |
| 10    | 2.71                                                     | Fe <sub>2</sub> O <sub>3</sub> @MoS <sub>2</sub> <sup>[S3]</sup> | NO <sub>2</sub>                   | 1.25        | 150 °C                   |
| 20    | 3.68                                                     | ZnO <sup>[S4]</sup>                                              | CO                                | 2           | 250 °C                   |
| 50    | 3.36                                                     | MnO <sub>2</sub> <sup>[S5]</sup>                                 | Ethylene                          | 0.15        | 150 °C                   |
| 100   | 4.63                                                     | In <sub>2</sub> O <sub>3</sub> -ZnO <sup>[S6]</sup>              | CO                                | 1.1         | 400 °C                   |
| 200   | 6.21                                                     | SnO <sub>2</sub> <sup>[S7]</sup>                                 | CO                                | 3*          | 300 °C                   |
| 400   | 7.52                                                     | In <sub>2</sub> O <sub>3</sub> -ZnO <sup>[S6]</sup>              | ethanol                           | 7.1         | 400 °C                   |
| 800   | 9.43                                                     | N/A                                                              | N/A                               | N/A         | N/A                      |
| 1000  | 14.2                                                     | In <sub>2</sub> O <sub>3</sub> <sup>[S8]</sup>                   | methanol                          | 0.5         | 200 °C                   |
| 1500  | 21.5                                                     | In <sub>2</sub> O <sub>3</sub> <sup>[S8]</sup>                   | CO                                | 1.0         | 200 °C                   |

The symbol “\*” represents another defined method of response  $R_a/R_g$  in the references and the differences between these two ways can see our previous work<sup>[S9]</sup>.



**Electronic Supporting Information**

Table S4. The comparison of additives' lubrication effect between this work (MoS<sub>2</sub>/SnO<sub>2</sub>/CNF) and similar state-of-the-art materials.

| Additives                               | Structures    | Amount     | Base oil       | f <sub>1</sub> | f <sub>2</sub> | load   | Reference                     |
|-----------------------------------------|---------------|------------|----------------|----------------|----------------|--------|-------------------------------|
| MoS <sub>2</sub> /SnO <sub>2</sub> /CNF | necklace      | 0.042 g/mL | PAO4           | 0.247          | 0.126          | 100 N  | This work                     |
| MoS <sub>2</sub> /SnO <sub>2</sub> /CNF | necklace      | 0.042 g/mL | CNOOC 32#      | 0.236          | 0.129          | 100 N  | This work                     |
| h-BN&Graphene                           | 2D&3D         | 0.2 wt%    | PAO4           | 0.09           | 0.06           | 100 N  | Qi et al. <sup>[46]</sup>     |
| MoS <sub>2</sub> /SnO <sub>2</sub> /CNF | necklace      | 0.042 g/mL | Abu Dhabi 100N | 0.239          | 0.132          | 100 N  | This work                     |
| Modified TiO <sub>2</sub>               | nanoparticles | 0.5%       | PAO10          | ~0.2           | ~0.06          | 200 N  | Zhang et al. <sup>[S10]</sup> |
| Carbon/polymer                          | nanofiber     | 1:4 (wt)   | BPETPP-E       | 0.9            | 0.3            | 0.74 N | Chen et al. <sup>[56]</sup>   |
| graphene                                | sheets        | 0.3 wt%    | hydraulic oil  | ~0.22          | ~0.10          | 8 N    | Mao et al. <sup>[S11]</sup>   |
| Modified CuS                            | nanoparticles | 0.8 wt%    | water          | ~0.55          | ~0.18          | 1 N    | Zhao et al. <sup>[S12]</sup>  |
| WS <sub>2</sub>                         | nanosheets    | 1%         | PAO8           | ~0.24          | ~0.10          | 200 N  | Zhang et al. <sup>[57]</sup>  |
| MoS <sub>2</sub>                        | nanoparticles | 1 wt %     | PAO            | N/A            | Reduce         | 5.4 N  | Jazaa et al.<br>[S13]         |
|                                         |               |            |                |                | ~ 20%          |        |                               |

The f<sub>1</sub> or f<sub>2</sub> represent the friction coefficient before or after the utilizing of lubricant additives.

**References**

- [S1] F. Yang and Z. Guo, *J. Colloid Interface Sci.*, **2015**, *448*, 265-274.
- [S2] Y. Ren, Y. Zou, Y. Liu, X. Zhou, J. Ma, D. Zhao, G. Wei, Y. Ai, S. Xi, Y. Deng, *Nat. Mater.*, **2020**, *19*, 203-211.
- [S3] M. Yin, Y. Wang, L. Yu, H. Wang, Y. Zhu, C. Li, *J. Alloys Compd.*, **2020**, *829*, 154471.
- [S4] G. E. Buono-Core, A. H. Klahn, G. Cabello, L. Lillo, *Polyhedron* **2013**, *62*, 1-6.
- [S5] L. Bigiani, D. Zappa, E. Comini, C. Maccato, A. Gasparotto, D. Barreca, *J. Nanosci. Nanotechnol.* **2020**, *20*, 3025-3030.
- [S6] N. Singh, A. Ponzoni, R. K. Gupta, P. S. Lee, E. Comini, *Sens. Actuators, B* **2011**, *160*, 1346-1351.
- [S7] C. Li, M. Lv, J. Zuo, X. Huang, *Sensors* **2015**, *15*, 3789-3800.
- [S8] A. Salehi, *Sens. Actuators, B* **2003**, *94*, 184-188.
- [S9] F. Yang, F. Wang, Z. Guo, *J. Colloid Interface Sci.* **2018**, *524*, 32-41.
- [S10] R. Zhang, D. Qiao, X. Liu, Z. Guo, L. Hu, L. Shi, *Ind. Eng. Chem. Res.* **2018**, *57*, 10379–10390.
- [S11] J. Mao, G. Chen, J. Zhao, Y. He, J. Luo, *Friction* **2020**, DOI: 10.1007/s40544-019-0327-x.
- [S12] J. Zhao, G. Yang, Y. Zhang, S. Zhang, P. Zhang, *Tribol. Lett.* **2019**, *67*, 88 (No.).
- [S13] Y. Jazaa , T. Lan, S. Padalkar, S. Sundararajan, *Lubricants* **2018**, *6*, 106 (No.).
